# Supplementary material
Source: ML conference proceedings conference paper supplement (https://openaccess.thecvf.com/content/ICCV_2019/html/Ebel_Beyond_Cartesian_Representations_ICCV_2019_paper.html)
Supplement: Supplementary file 1 [file Ebel_Beyond_Cartesian_Representations_ICCV_2019_supplemental.pdf]

## 6. Beyond Cartesian Representations for Local Descriptors: Supplementary Material

### 6.1. Regarding the Dataset

In order to train scale-invariant models with real data relevant to wide-baseline stereo, it was necessary to collect training data. For this we rely on public collections of photo-tourism images in the Yahoo Flickr Creative Commons 100M (YFCC) dataset. We use COLMAP, a Structure from Motion (SfM) framework, to obtain 3D reconstructions. COLMAP provides us with sparse point clouds and depth maps for each image. We clean up the depth maps following the procedure outlined in the paper and use them, along with the ground truth camera poses, to project keypoints between corresponding images.

We sample pairs of images with a visibility check in order to guarantee that a minimum number of keypoints can be extracted and matched across both views. Specifically, we retrieve the SfM keypoints in common over both views, extract their bounding box, and reject the image pair if it is smaller than a given threshold (we use 0.5) for either image.

We use 11 sequences for training and validation and 9 for testing. We list their details in Table 6, and give some examples in Fig. 6. This data will be made publicly available along with code and pre-trained models.

| Sequence name           | Num. images | Sequence name           | Num. images |
|-------------------------|-------------|-------------------------|-------------|
| brandenburg_gate        | 1363        | british_museum          | 660         |
| buckingham_palace       | 1676        | florence_cathedral_side | 108         |
| colosseum_exterior      | 2063        | lincoln_memorial_statue | 850         |
| grand_place_brussels    | 1083        | milan_cathedral         | 124         |
| notre_dame_front_facade | 3765        | mount_rushmore          | 138         |
| palace_of_westminster   | 983         | reichstag               | 75          |
| pantheon_exterior       | 1401        | sagrada_familia         | 401         |
| sacre_coeur             | 1179        | st_pauls_cathedral      | 615         |
| st_peters_square        | 2504        | united_states_capitol   | 258         |
| taj_mahal               | 1312        | Total                   | 4107        |
| temple_nara_japan       | 904         |                         |             |
| Total                   | 18233       |                         |             |

Table 6: **Dataset details.** Left: training sequences. Right: Test sequences.

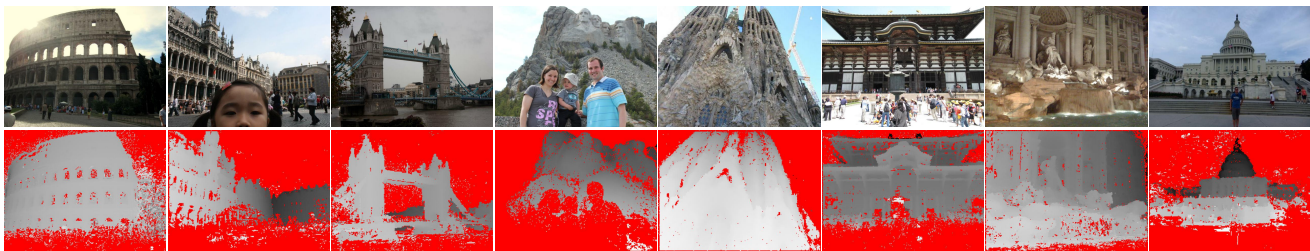

Figure 6: **Dataset samples.** We show the original images and their corresponding depth maps, estimated by COLMAP and post-processed by us as explained in Section 4.1.1. The depth maps are color-coded by depth, in grayscale, with red indicating occlusions and regions for which depth estimates are not available. Notice how despite some noise and occluded areas, the depth estimates are good enough to extract training data.
